# Supplementary material
Source: PubMed Central journal article supplement (PMC3113247)
Supplement: mmc1.pdf [file mmc1.pdf]

The American Journal of Human Genetics, Volume 88

**Supplemental Data**

**Mutations in *FYCO1* Cause**

**Autosomal-Recessive Congenital Cataracts**

Jianjun Chen, Zhiwei Ma, Xiaodong Jiao, Robert Fariss, Wanda Lee Kantorow, Marc Kantorow, Eran Pras, Moshe Frydman, Elon Pras, Sheikh Riazuddin, S. Amer Riazuddin, and J. Fielding Hejtmancik



**B**

**Family 060041**

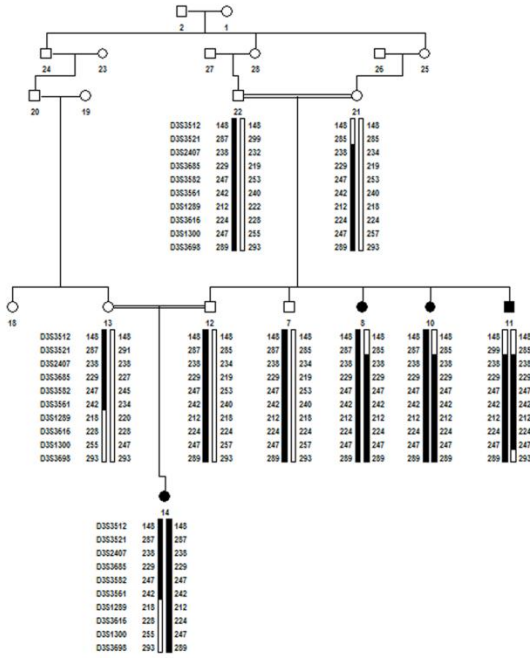

**Family 060044**

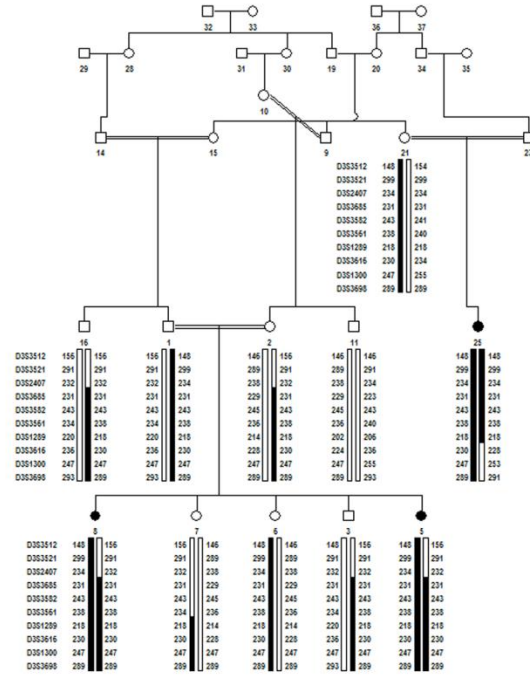

**Family 060064**

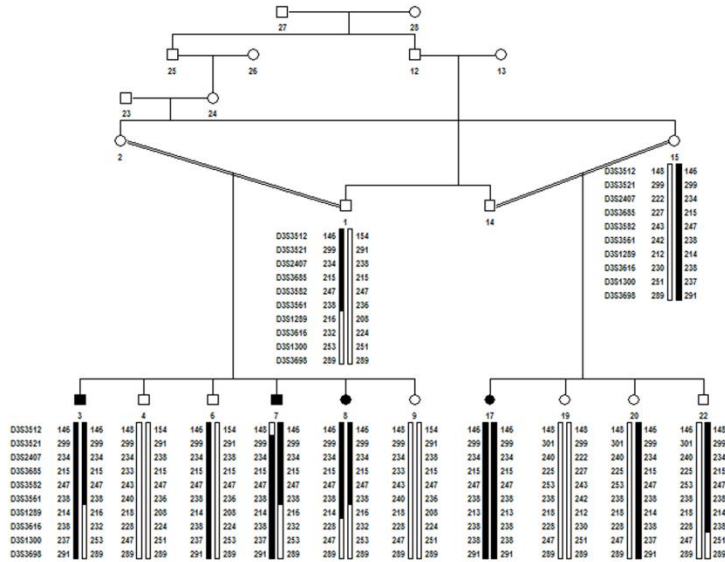

**Family 060054**

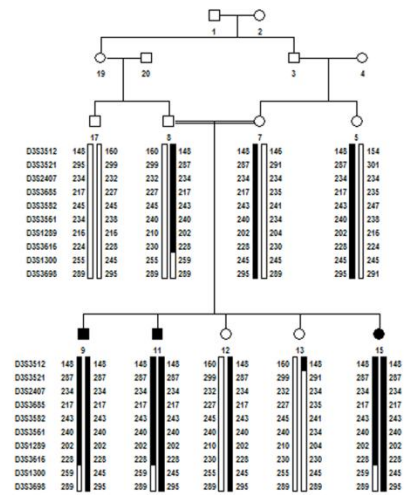

C

### Family 060058

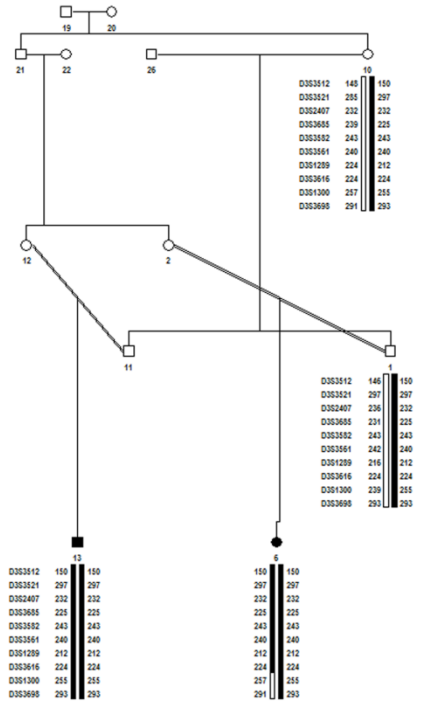

### Family 060069

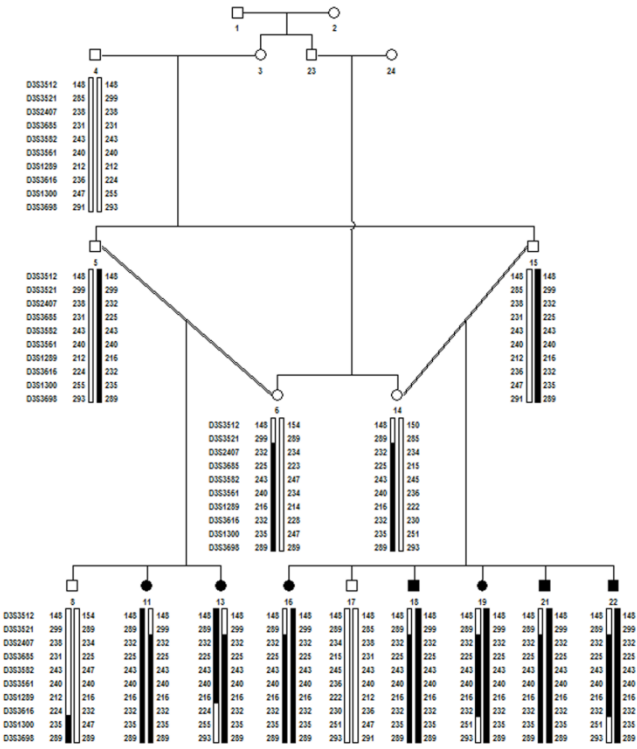

### Family 060091

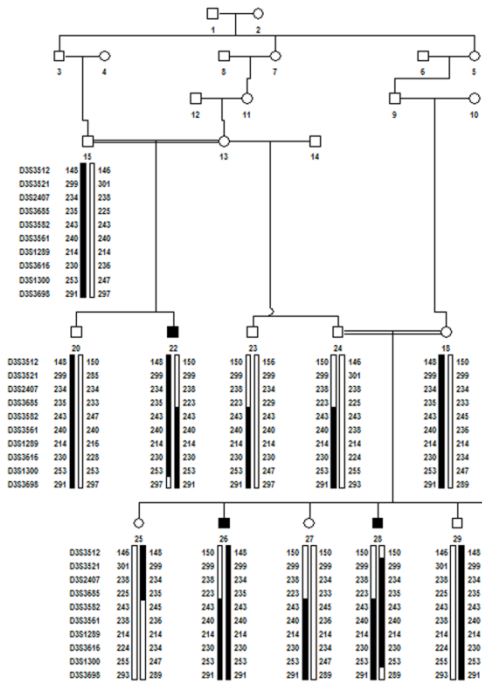

### Family 060094

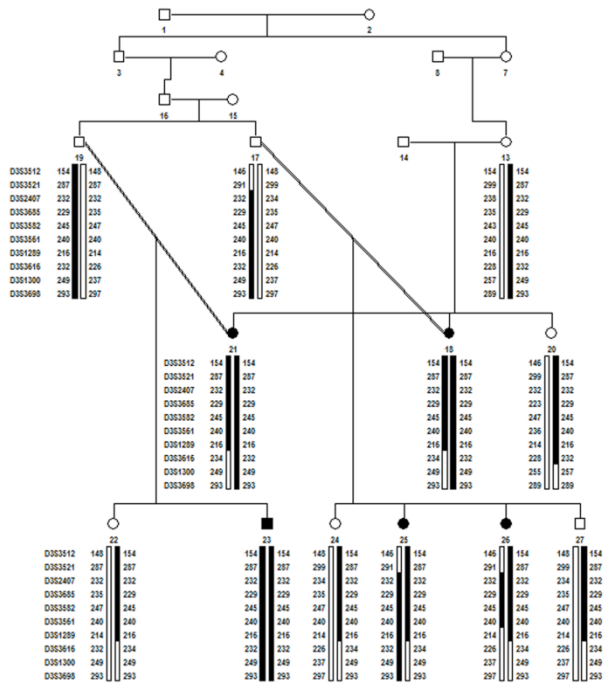

Figure S1. Pedigrees with haplotypes for ten consecutive chromosome 3p microsatellite markers. The blackened bars correspond to affected haplotypes with alleles that cosegregate with the disease and that are homozygous in affected individuals.

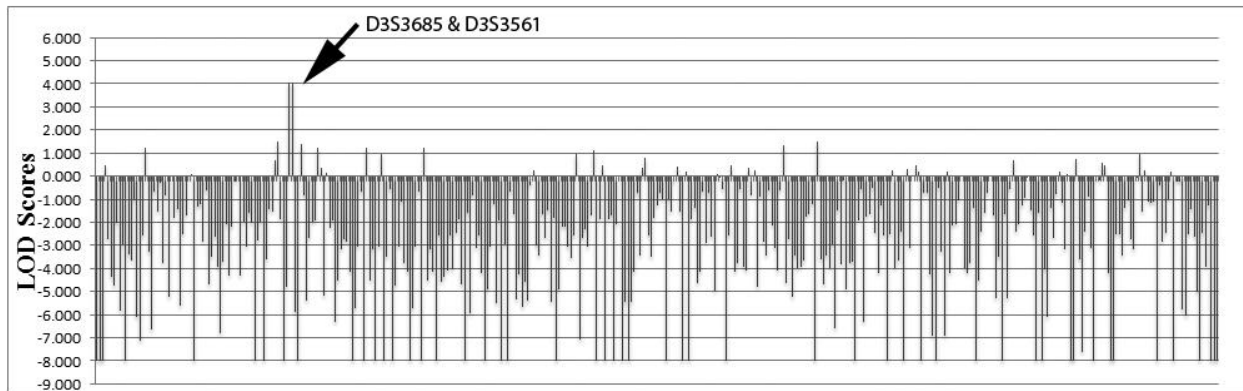

Figure S2. Graphical Illustration of the Two-Point LOD Scores Obtained during the genome-wide scan at  $\theta = 0$  for family 60041 (PKCC041). Similar genome wide analyses using STR markers from the md-10 linkage panels (ABI, Foster City, CA) were carried out on all families except for approximately 10 that underwent exclusion analysis with closely linked STR markers. Note: A two point LOD scores of -8 represents  $-\infty$ .

Table S1: Primer sequences for genotyping of the genetic markers on 3p22-p21. Genotyping primers for 3p22-p21 incorporating a M13 tag in italics.

| Marker  | Forward (5'>3')                                     | Reverse (5'>3')         | Amplicon Length(bp) |
|---------|-----------------------------------------------------|-------------------------|---------------------|
| D3S3512 | <i>CACGACGTTGTAAAACGACAGATCCCACACCTGCCTCC</i>       | ACCAAGTTTTTAAGGCCAATGC  | 132-162             |
| D3S3521 | <i>CACGACGTTGTAAAACGACCAGTAAGTCCATGCCAGGG</i>       | GCAGCAGTTACCTTGGAGTG    | 246-306             |
| D3S2407 | <i>CACGACGTTGTAAAACGACTGTACCCTATAGAAGTAAGACCAGG</i> | GGAGTTCAAGTTACAGTCAGC   | 223-241             |
| D3S3685 | <i>CACGACGTTGTAAAACGACAACAACCCAGCTCTTTGTG</i>       | AATACAGGTAACCCTGCCC     | 196-240             |
| D3S3582 | <i>CACGACGTTGTAAAACGACCGATGTGGCTCTGAACTC</i>        | AGGGCCTGTTCCCTAAG       | 239-255             |
| D3S3561 | <i>CACGACGTTGTAAAACGACTCCTGGGGACTGTGATG</i>         | GGTACTGGAGGTTCAAG       | 204-248             |
| D3S1289 | AAAGCAACTTGTAAAGAGAGCA                              | CTCCTAGATATAATCACTGGCA  | 197-215             |
| D3S3616 | <i>CACGACGTTGTAAAACGACTTCAACTCAGAGACTCAAGTGAC</i>   | CCCCTGGGAAGTTACATCAC    | 223-243             |
| D3S1300 | AGCTCACATTCTAGTCAGCCT                               | GCCAATCCCCAGATG         | 217-241             |
| D3S3698 | <i>CACGACGTTGTAAAACGACGGTTACCAGGGTCTGGG</i>         | GAAGAGATTACCATAATGAAGCC | 289-297             |

Table S2. Primers used for amplification and sequence analysis of human *FYCO1*. All primers were amplified using a touchdown protocol beginning at 64°, decreasing by 2° each two cycles, until finishing at a final annealing temperature of 57°.

| Primers for | Forward (5'>3')        | Reverse (5'>3')       | Amplicon Length (bp) |
|-------------|------------------------|-----------------------|----------------------|
| FYCO1_EX2   | CAGATAGGGTGACCTTTGTGC  | GATGTGACCTGAGGACTCCAA | 400                  |
| FYCO1_EX3   | CACTGACCACTTGCTCCTCAT  | GGATCACACTTGGAGGATTGA | 380                  |
| FYCO1_EX4   | GTGCTGGCACCTAAGAAGCTA  | ACCACCCATAAACTCCCCTT  | 342                  |
| FYCO1_EX5   | GGGTAAAATTGGGTGACATTTT | CATTTCTGCACGGGATGA    | 276                  |
| FYCO1_EX6   | GAAATTGGTTTGTGTGCCTGT  | GACTGGTGGCAATCTTCAAAA | 352                  |
| FYCO1_EX7   | TGGAATCTGTTGGCTTTGACT  | GGAACAGCAGCCATAACTGAG | 377                  |
| FYCO1_EX8-1 | GGGCAGGTAATGCCTGTATTT  | AGTCCTCCTCCTTCTCTGCTG | 479                  |
| FYCO1_EX8-2 | AGAGAGAACCAGGAGCTGAGG  | CTGTCTGTTGACCTCCTCGAC | 498                  |
| FYCO1_EX8-3 | AAACCAGCATTAGCCAGCTT   | CAGAGACCTGACCTCCTGCT  | 451                  |
| FYCO1_EX8-4 | GAGTTGTCTGGGAAGGGACA   | TCCTTCTCCAGCTCCCTGT   | 500                  |
| FYCO1_EX8-5 | GGCAGGTGAGAAGAATGAGG   | GAGCCCTAAGCTCTCTGTGC  | 500                  |
| FYCO1_EX8-6 | ACTTGGGTGACCAGATGGAG   | CTGCTGCACAAGGGTTTTGT  | 473                  |
| FYCO1_EX8-7 | CCCACCCACTGACAATGAA    | CTCCACTCGCTCCTTTTCC   | 499                  |
| FYCO1_EX8-8 | AGCTGGGCATCCAGGTTT     | CCTGCACCCACAGTACATTCT | 461                  |
| FYCO1_EX9   | AAAGCTCATTGAGGAGCCAGT  | GGGTCAGGGTACAAACTAGGG | 380                  |
| FYCO1_EX10  | GGTTCATGGCCTCTTGAAGT   | GGCTTTTCTTGCAAAAGGACT | 385                  |
| FYCO1_EX11  | GCAGTAGCACCCCTCATTAGA  | CCTGAGACAGCAGCAAGAAAG | 387                  |
| FYCO1_EX12  | TGGATTCTCTCCTTTTCTTCC  | GGTGCCAACACCTATCACAGA | 289                  |
| FYCO1_EX13  | TCATGGCCACATCCTAAGT    | GGAAGTGGCACCTAGAGAACA | 400                  |
| FYCO1_EX14  | TAAATTGTGCCTCAGCAGCTT  | AATCCTGCTTCCAGTGTCTCA | 370                  |
| FYCO1_EX15  | AAAATCTGCCAGGGTCTCTGT  | AGAATAAACGAAGCCCCACTG | 379                  |
| FYCO1_EX16  | GGGCTTGTCTCTCAAGAGTC   | AGAAAGGCCTGCCAAGTA    | 397                  |
| FYCO1_EX17  | GCAACACACTCAGCCTCCTAC  | AGAACACTGGAACACCACAGG | 370                  |
| FYCO1_EX18  | CCTCAGGAGAGTCCACAGTGA  | CAGGGGCTGAGTTGATGATT  | 400                  |



Table S3. Allele frequencies in the Pakistani population for chromosome 1 markers used in fine mapping.

| Marker  | Alleles frequency in the Pakistani population                                                                                                |
|---------|----------------------------------------------------------------------------------------------------------------------------------------------|
| D3S3512 | 136(.01), 138(.01), 144(.02), 146(.24), 148(.41), 150(.05), 152(.03), 154(.1), 156(.04), 158(.08 ), 160(.01 )                                |
| D3S3521 | 285(.11), 287(.11), 289(.11), 291(.12), 293(.07), 295(.03), 297(.01), 299(.33 ), 301(.07), 303(.03 ), 307(.01 )                              |
| D3S2407 | 222(.04), 226( .02 ), 228(.03), 230(.05), 232(.39), 234(.02), 236(.17), 238(.21), 242(.06), 248(.01)                                         |
| D3S3685 | 207(.01), 215(.03), 217(.04), 219(.02), 221(.01), 223(.02), 225(.14), 227(.07 ), 229(.16),231(.11), 233(.08), 235(.17 ), 237(.1 ), 239(.01 ) |
| D3S3582 | 239(.02 ), 241(.03), 243(.27), 245(.24), 247(.26), 251(.03), 253(.14), 255(.01)                                                              |
| D3S3561 | 234(.29 ), 236(.1), 238(.14), 240(.32), 242(.12), 244(.03 )                                                                                  |
| D3S1289 | 204(.09), 206(.01), 208(.05 ), 210(.01), 212(.18), 214(.11), 216(.26 ), 218(.22), 220(.04), 222(.03 )                                        |
| D3S3616 | 214(.01), 216(.01), 222(.01), 224(.17 ), 226(.12), 228(.21), 230(.15), 232(.13), 234(.09), 236(.07), 238(.02 ), 240(.01)                     |
| D3S1300 | 235(.2), 237(.01), 245(.02 ), 247(.27), 249(.01), 251(.06 ), 253(.21), 255(.16), 257(.03), 259(.02), 261(.01)                                |
| D3S3698 | 289(.51), 291(.14), 293(.28), 295(.01), 297(.03), 299(.03)                                                                                   |
